# Supplementary material for: Evaluation of simulated CO 2 power plant plumes from six high-resolution atmospheric transport models
Source: Copernicus journal article supplement (doi:10.5194/acp-23-2699-2023), 2023-02-27
Supplement: Supplementary file 3 [file acp-23-2699-2023-supplement.zip]

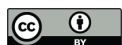

## *Supplement of*

# **Evaluation of simulated CO<sub>2</sub> power plant plumes from six high-resolution atmospheric transport models**

**Dominik Brunner et al.**

*Correspondence to:* Dominik Brunner ([dominik.brunner@empa.ch](mailto:dominik.brunner@empa.ch))

- [acp-23-2699-2023-supplement-title-page.pdf](#)
- [Supplement\\_S1\\_Power\\_Plant\\_Model\\_Evaluation\\_v5.pdf](#)
- [Supplement\\_S2\\_powerplant\\_modeling\\_protocol.pdf](#)
- [Supplement\\_S3\\_Power\\_Plant\\_Model\\_Evaluation.zip](#)
- [Supplement\\_S4\\_Energy\\_and\\_CO2\\_Belchatow\\_and\\_Jaenschwalde.xlsx](#)
- [Supplement\\_S5\\_WRF-GHG\\_WRF-LES\\_comparison.xlsx](#)

The copyright of individual parts of the supplement might differ from the article licence.
